# Supplementary material for: One pot microwave assisted synthesis of bisphosphonate alkene capped gold nanoparticles
Source: Royal Society of Chemistry journal article supplement (doi:10.1039/c4ra11847b), 2014-01-01
Supplement: c4ra11847b1.pdf [file c4ra11847b1.pdf]

# One pot microwave assisted synthesis of bisphosphonate alkene capped gold nanoparticles

Romain Aufaure,<sup>†</sup> Yoann Lalatonne,<sup>†,‡,\*</sup> Nicole Lièvre,<sup>§</sup> Olivier Heintz,<sup>||</sup> Laurence Motte<sup>†</sup> and Erwann Guénin<sup>†\*</sup>

<sup>†</sup>Université Paris 13, Sorbonne Paris Cité, Laboratoire CSPBAT, CNRS (UMR 7244), 74 avenue M. Cachin, 93017 Bobigny, France

<sup>‡</sup>Department of Nuclear Medicine, Avicenne Hospital, Université Paris 13, Sorbonne Paris Cité, 74 avenue M. Cachin, 93017 Bobigny, France

<sup>§</sup>Université Paris 13, Sorbonne Paris Cité, UPRES 3410 Biothérapies Bénéfices et Risques, CNRS (UMR 7244), 74 avenue M. Cachin, 93017 Bobigny, France

<sup>||</sup>Université de Bourgogne, Laboratoire Interdisciplinaire Carnot de Bourgogne, CNRS (UMR 5209), 9 Avenue Alain Savary, BP 47870, 21078 Dijon Cedex, France

\*Address correspondence to: [guenin@univ-paris13.fr](mailto:guenin@univ-paris13.fr)

## Table of Contents

|                                                                                                        | Page No. |
|--------------------------------------------------------------------------------------------------------|----------|
| Figure S1. <sup>1</sup> H NMR spectrum (400 MHz, 25°C, D <sub>2</sub> O) of HMBPene .....              | S2       |
| Figure S2. <sup>13</sup> C NMR spectrum (100.63 MHz, 25°C, D <sub>2</sub> O) of HMBPene .....          | S3       |
| Figure S3. <sup>1</sup> H NMR spectrum (400 MHz, 25°C, D <sub>2</sub> O) of GNPs supernatant .....     | S4       |
| Figure S4. <sup>13</sup> C NMR spectrum (100.63 MHz, 25°C, D <sub>2</sub> O) of GNPs supernatant ..... | S5       |
| Figure S6. Stability of Au@HMBPene NPs (solutions were stored at 4°C) .....                            | S6       |
| Figure S5. MW heating vs Oil bath heating: Frens-Turkevich method in one step .....                    | S7       |
| Figure S7. Reproducibility study varying the heating mode and reagents concentration .....             | S8       |
| Figure S8. TGA of GNPs powder: loss in mass .....                                                      | S9       |
| Figure S9. TEM study of GNP's size and shape varying the HMBPene:HAuCl <sub>4</sub> ratio .....        | S10      |
| Figure S10. TEM study of GNP's shape for low HMBPene:HAuCl <sub>4</sub> ratio .....                    | S11      |

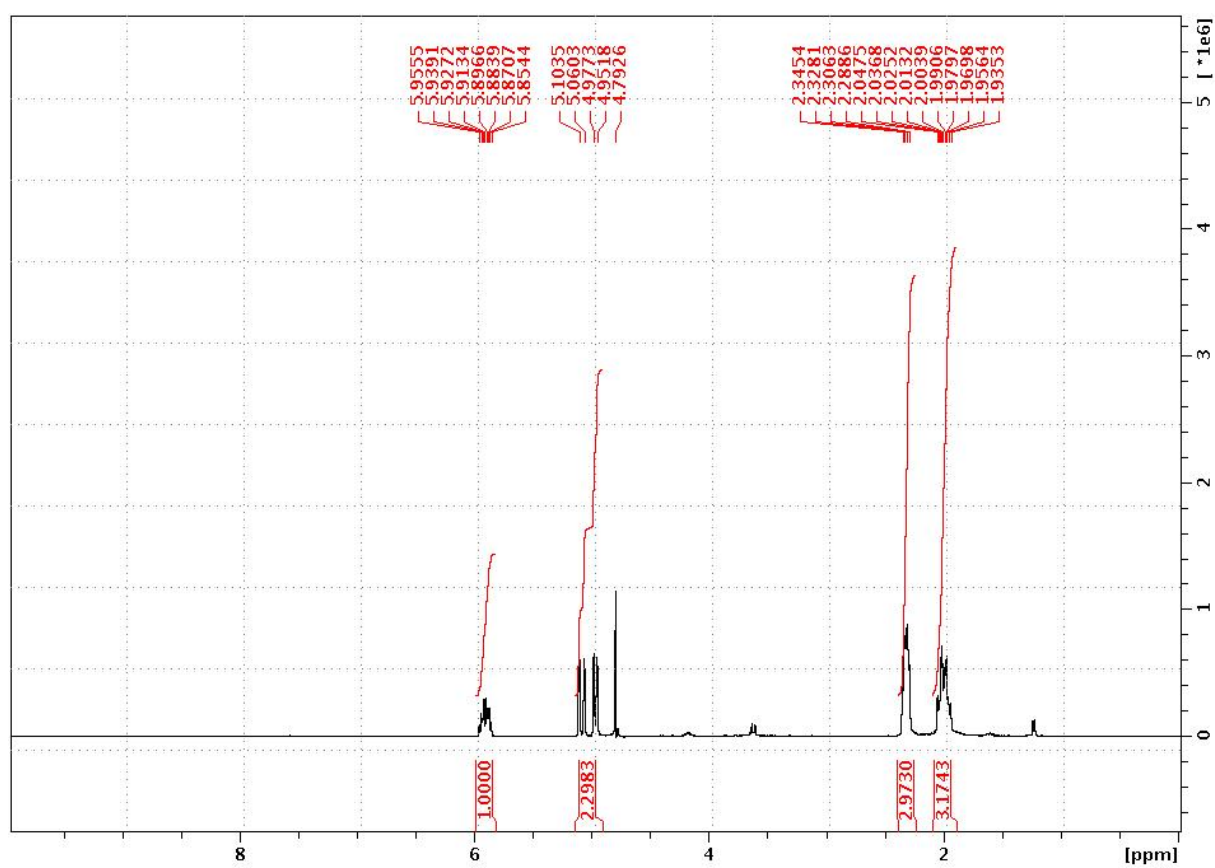

Figure S1. <sup>1</sup>H NMR spectrum (400 MHz, 25°C, D<sub>2</sub>O) of HMBPene

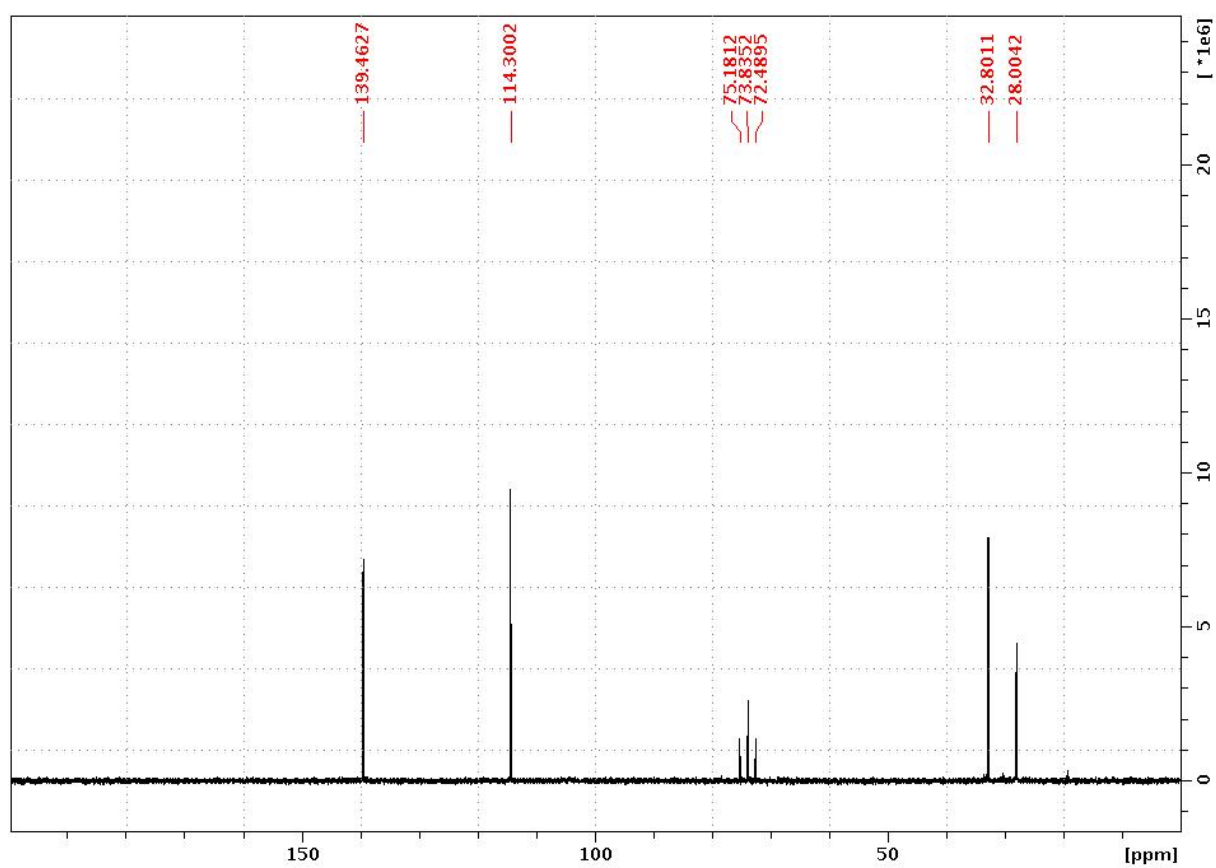

**Figure S2.** <sup>13</sup>C NMR spectrum (100.63 MHz, 25°C, D<sub>2</sub>O) of HMBPene

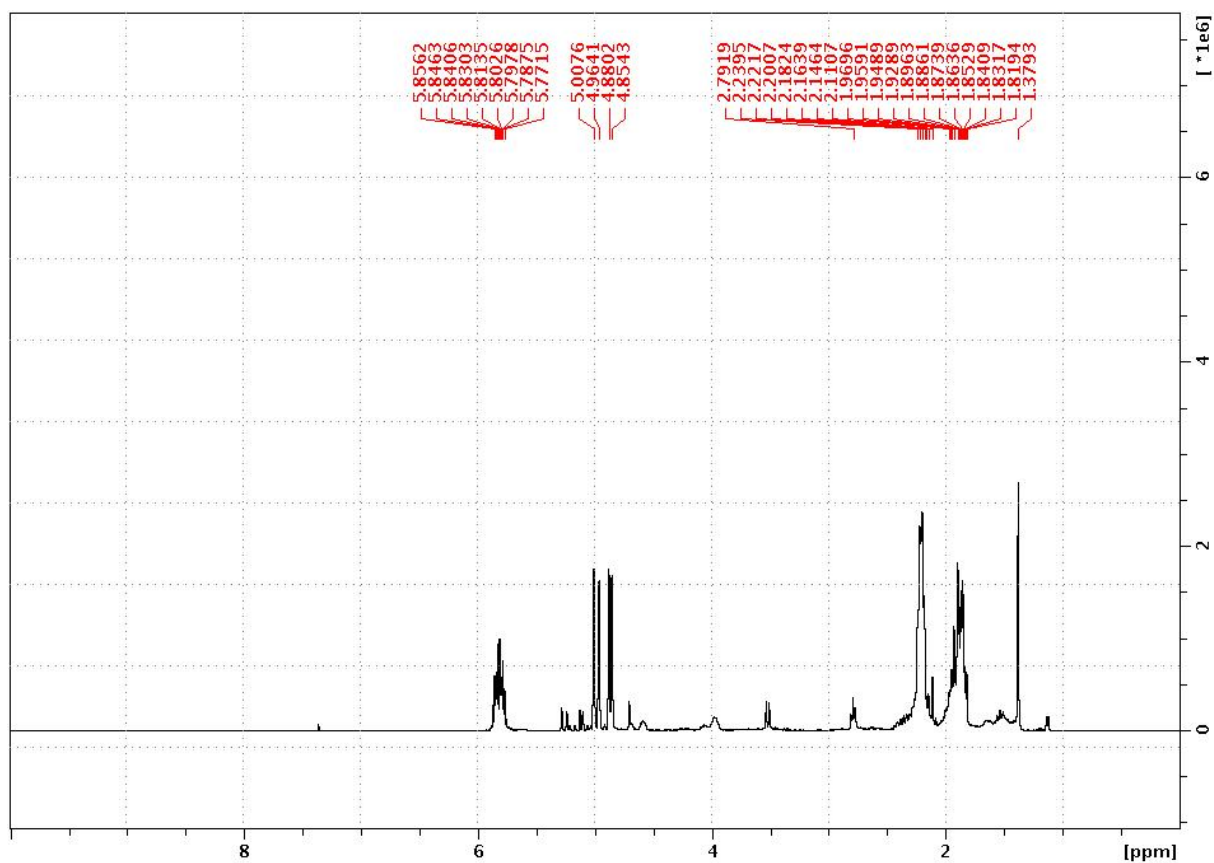

**Figure S3.  $^1\text{H}$  NMR spectrum (400 MHz, 25°C,  $\text{D}_2\text{O}$ ) of GNPs supernatant**



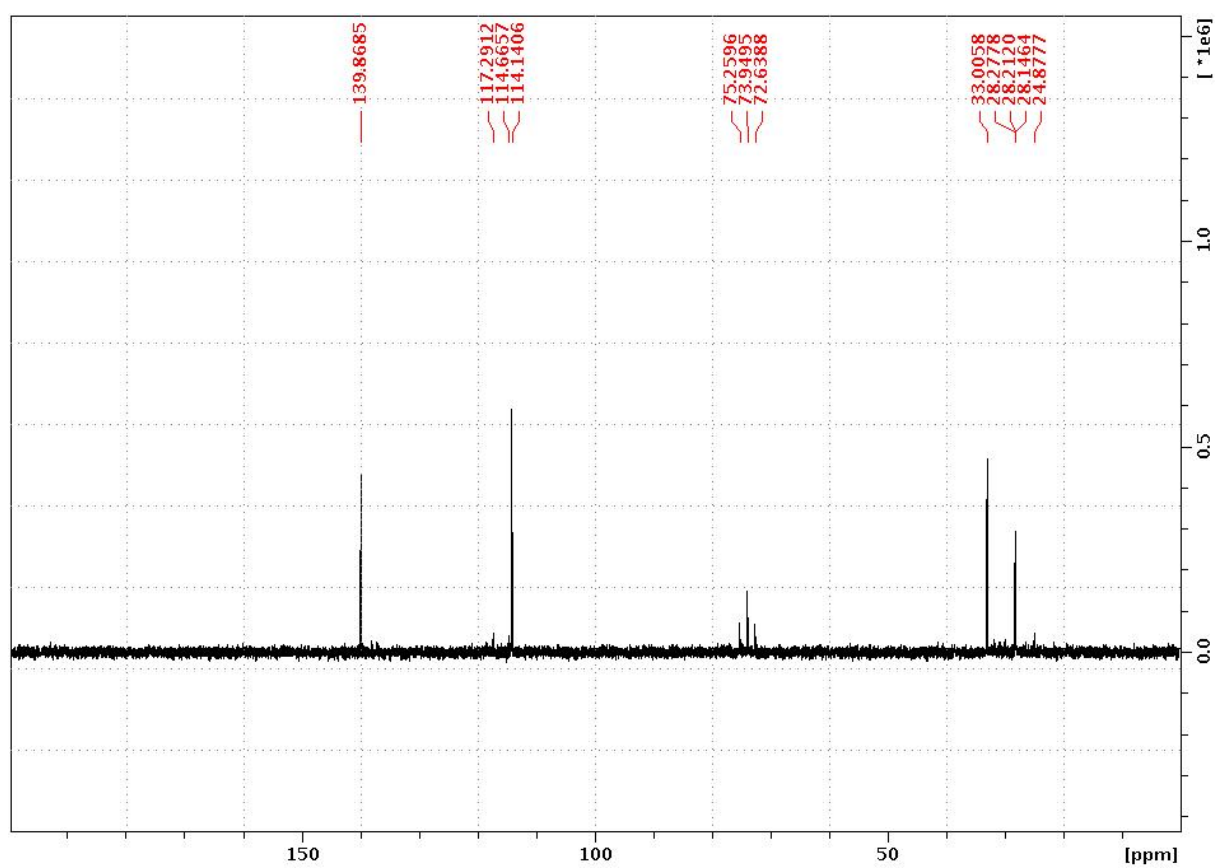

**Figure S4.  $^{13}\text{C}$  NMR spectrum (100.63 MHz, 25°C,  $\text{D}_2\text{O}$ ) of GNPs supernatant**

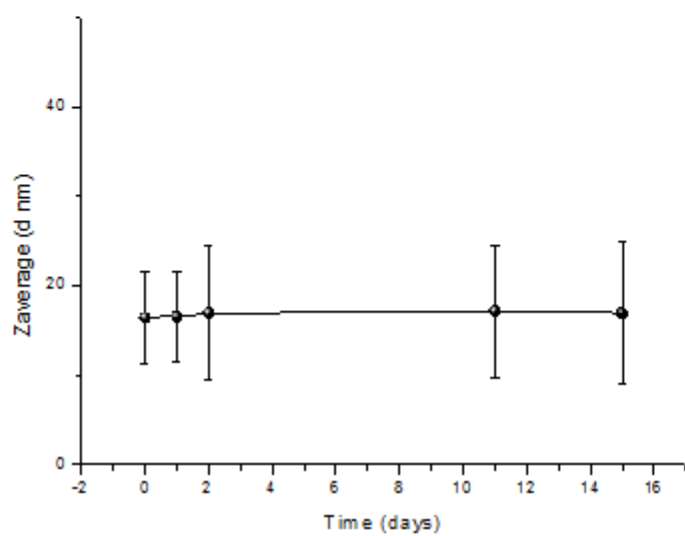

**Figure S6. Stability of Au@HMBPene NPs (solutions were stored at 4°C)**

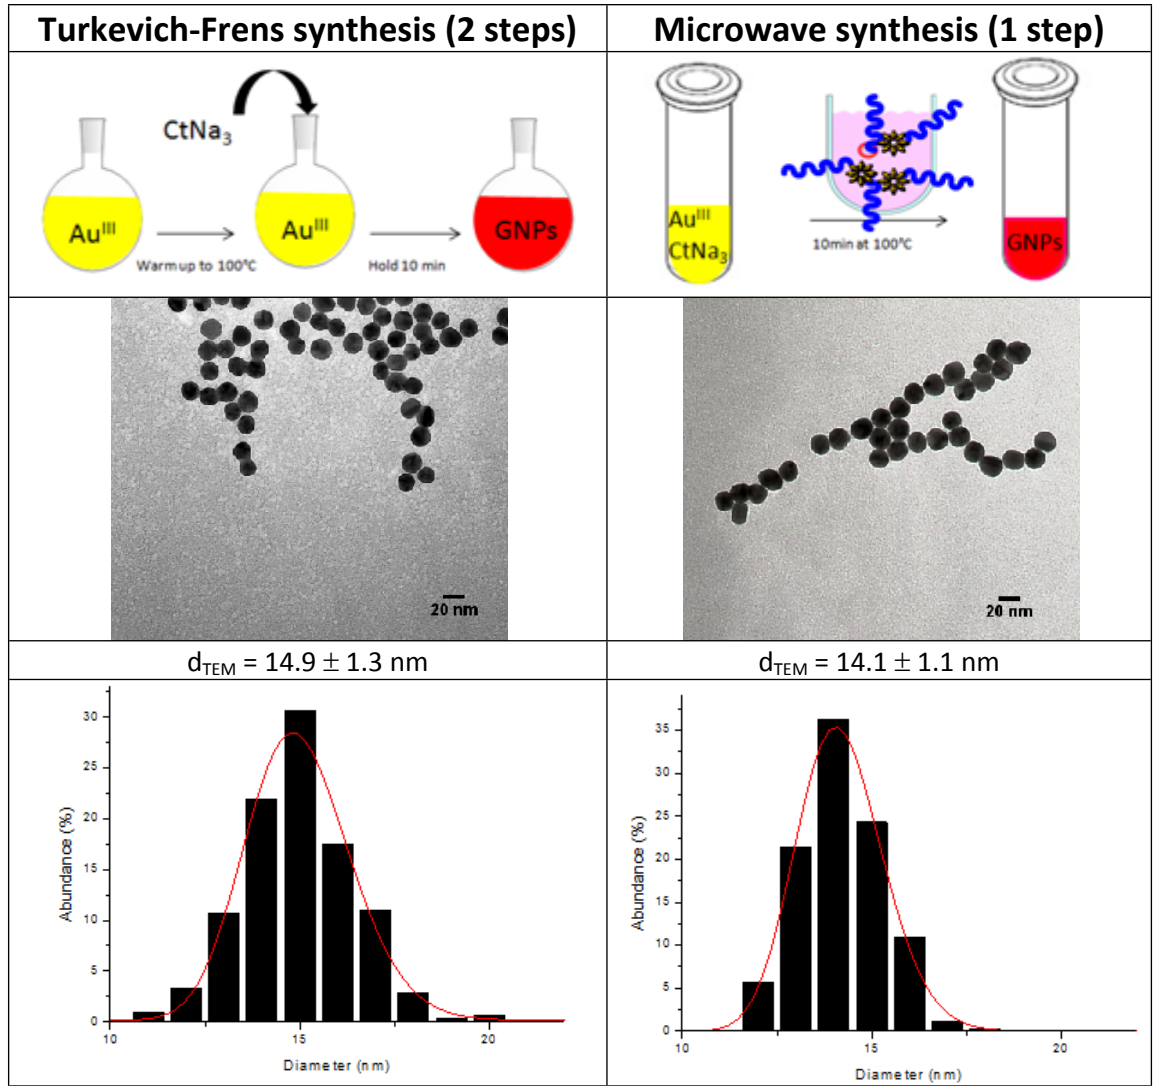

**Figure S5. MW heating vs Oil bath heating: Frens-Turkevich method in one step**

The median diameter  $d_{TEM}$  and standard deviation  $w$  were deduced from transmission electron microscopy (TEM) measurements, simulating the diameter  $d$  distribution with a log-normal function  $g(d)$  described in Equation (1).

$$g(d) = \frac{1}{\sigma d \sqrt{2\pi}} \exp \left( -\frac{\left( \ln \frac{d}{d_{TEM}} \right)^2}{2\sigma^2} \right)$$

The  $\ln(d)$  distribution standard deviation  $\sigma$  is related to the diameter  $d$  distribution standard deviation  $w$  by:

$$\sigma \approx \sqrt{\ln \left( 1 + \left( \frac{w}{d_{TEM}} \right)^2 \right)}$$

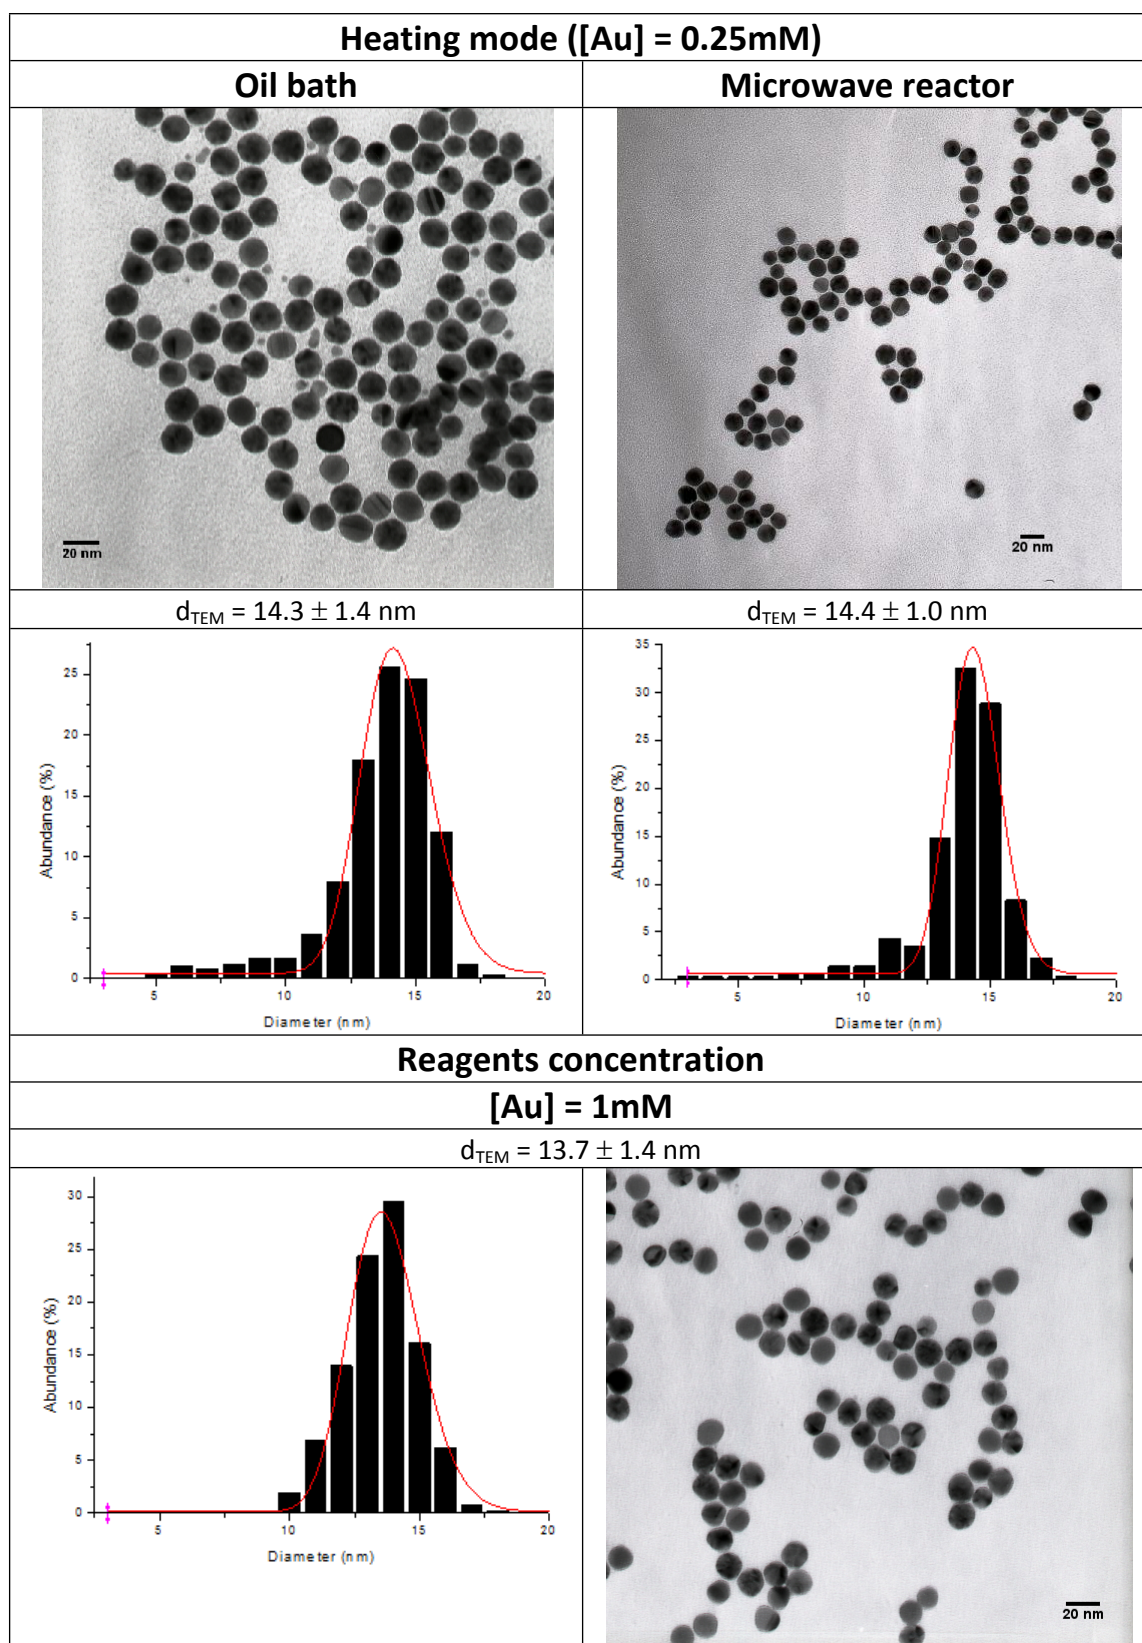

**Figure S7. Reproducibility study varying the heating mode and reagents concentration**

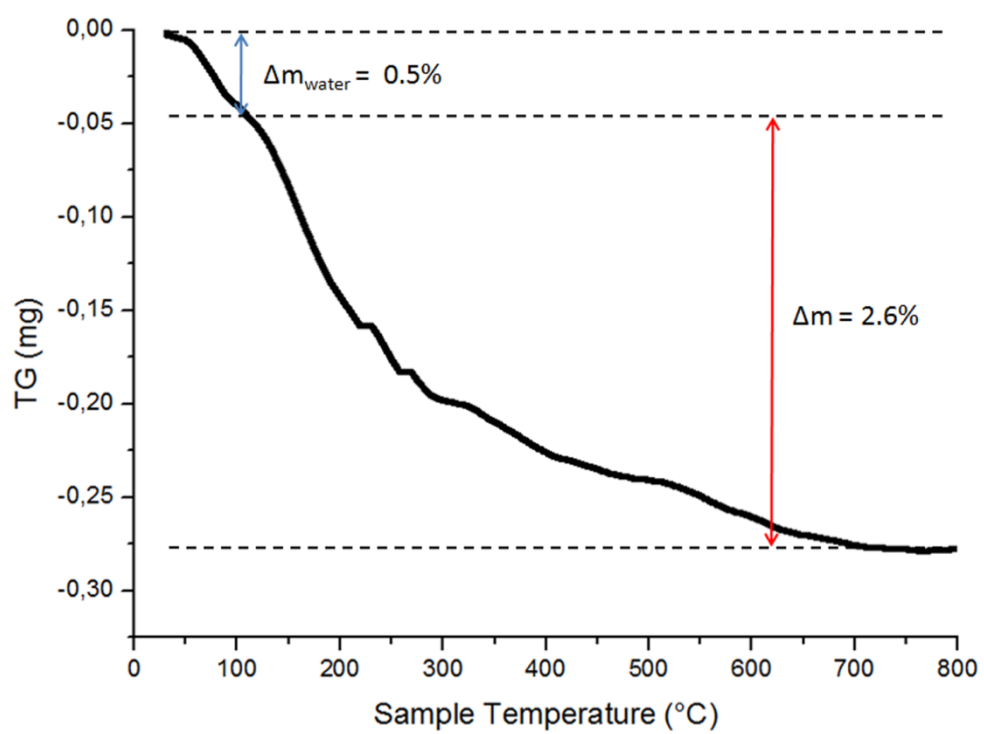

**Figure S8. TGA of GNPs powder: loss in mass**



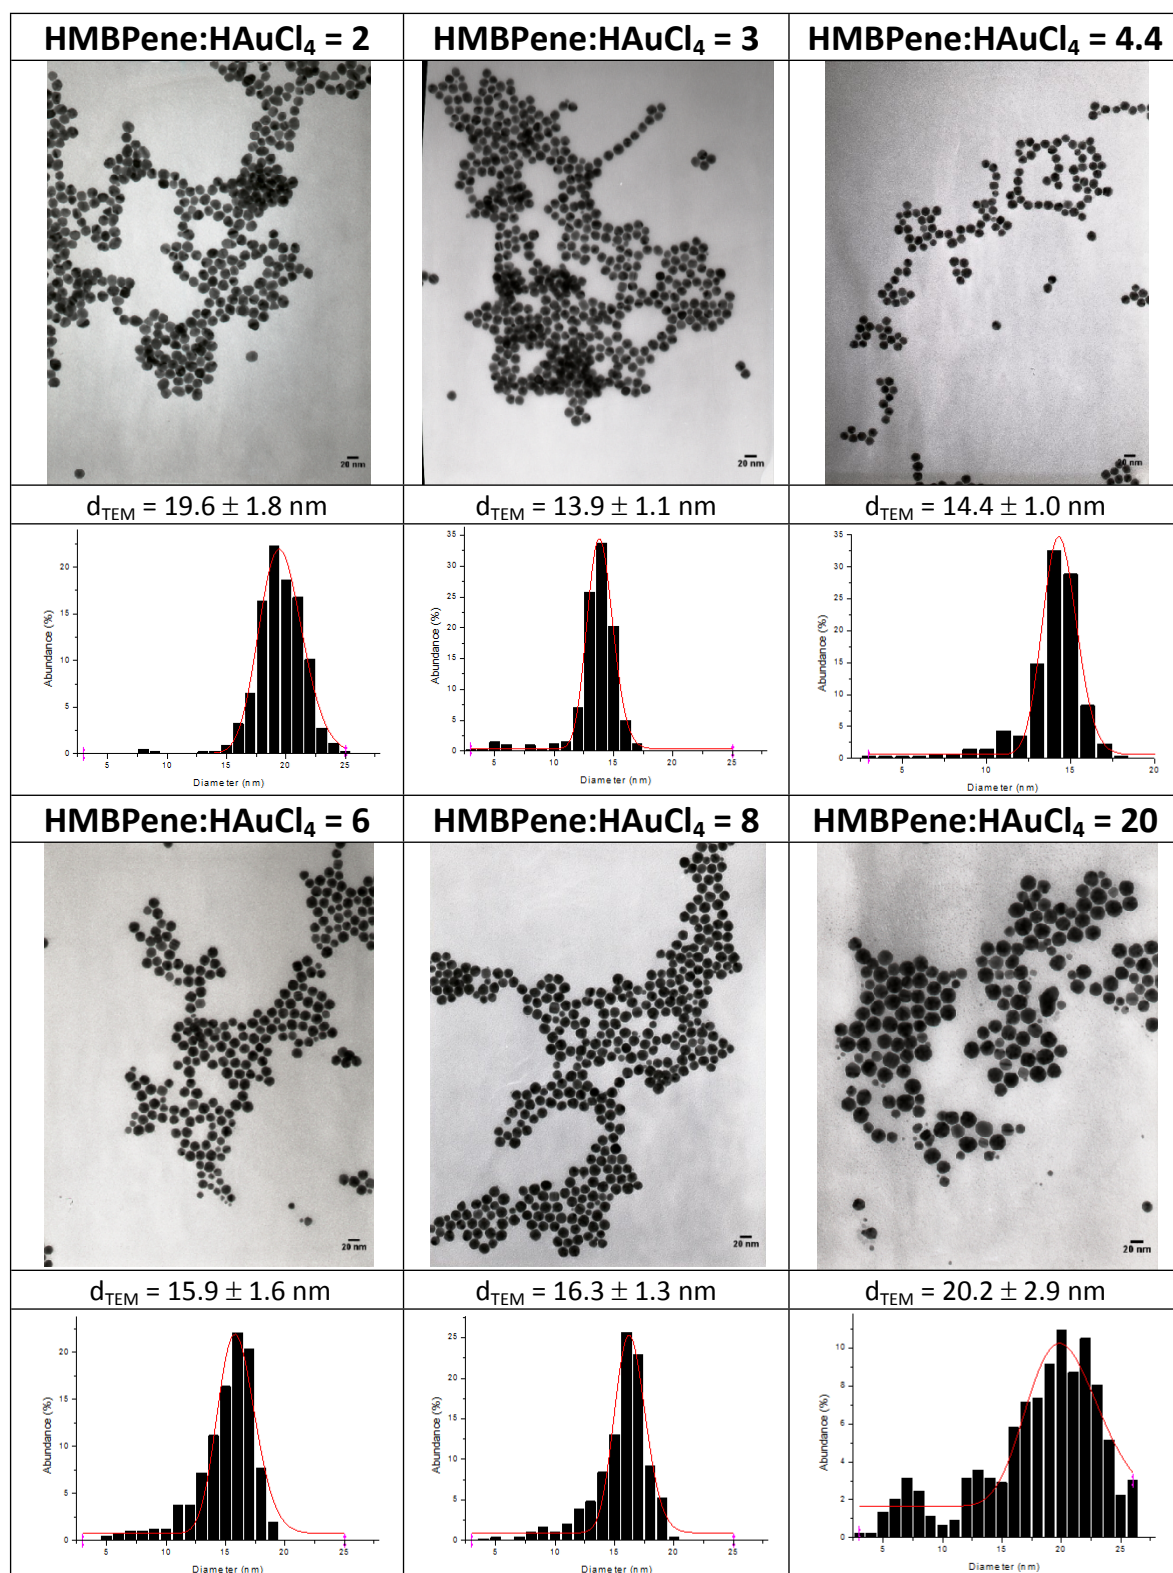

**Figure S9. TEM study of GNP's size and shape varying the HMBPene:HAuCl<sub>4</sub> ratio**

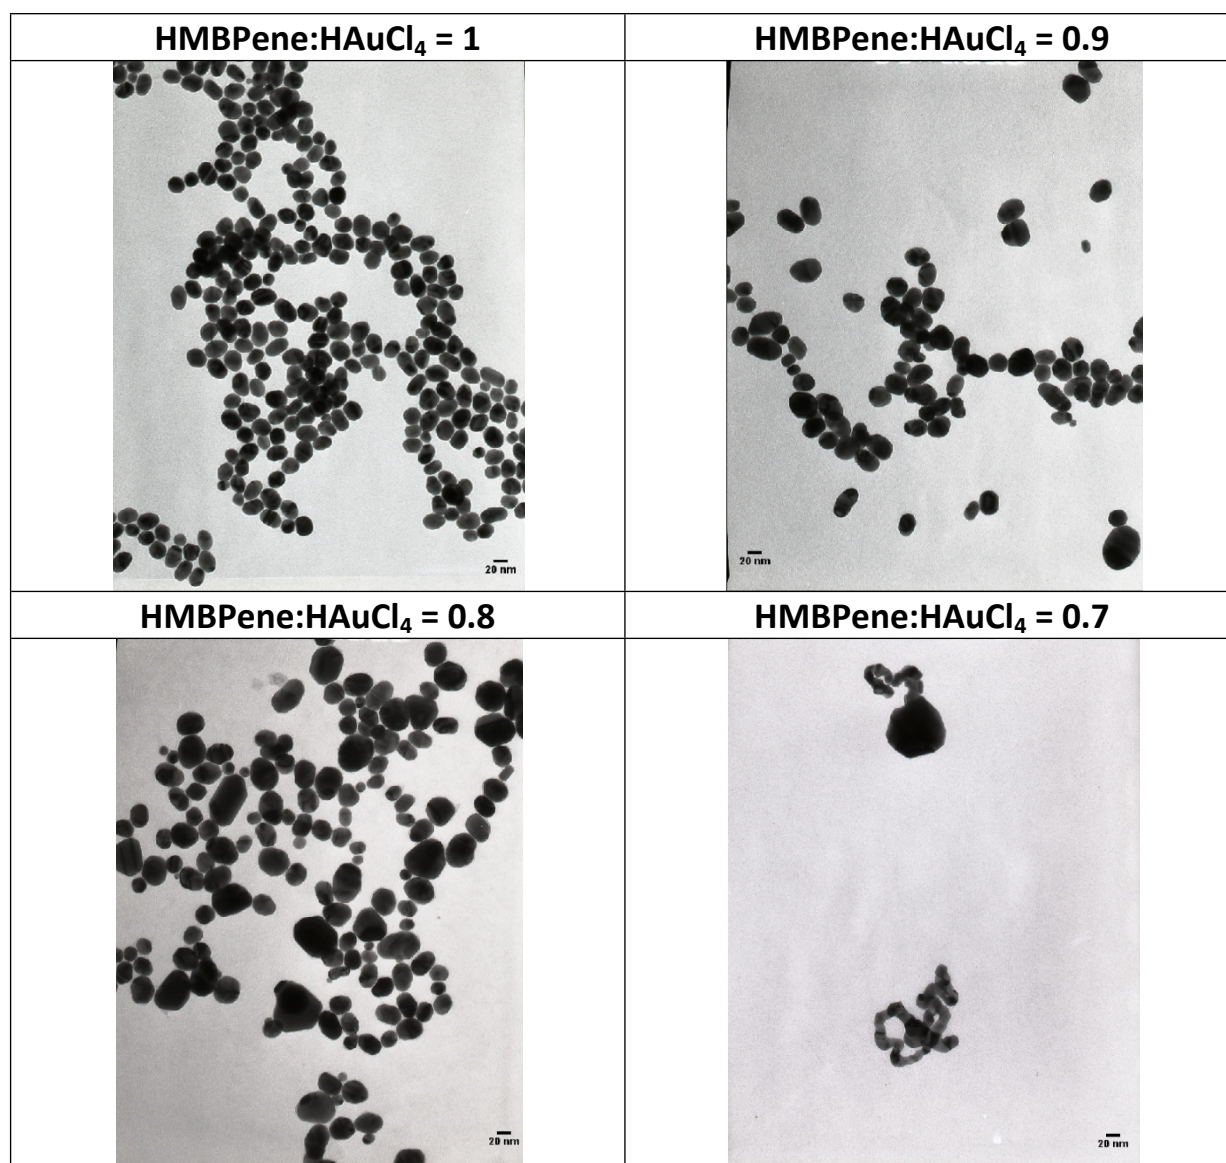

**Figure S10. TEM study of GNP's shape for low HMBPene:HAuCl<sub>4</sub> ratio**
